# Supplementary material
Source: PubMed Central journal article supplement (PMC4093996)
Supplement: supp_deu146_deu146suppl_fig1.pdf [file supp_deu146_deu146suppl_fig1.pdf]

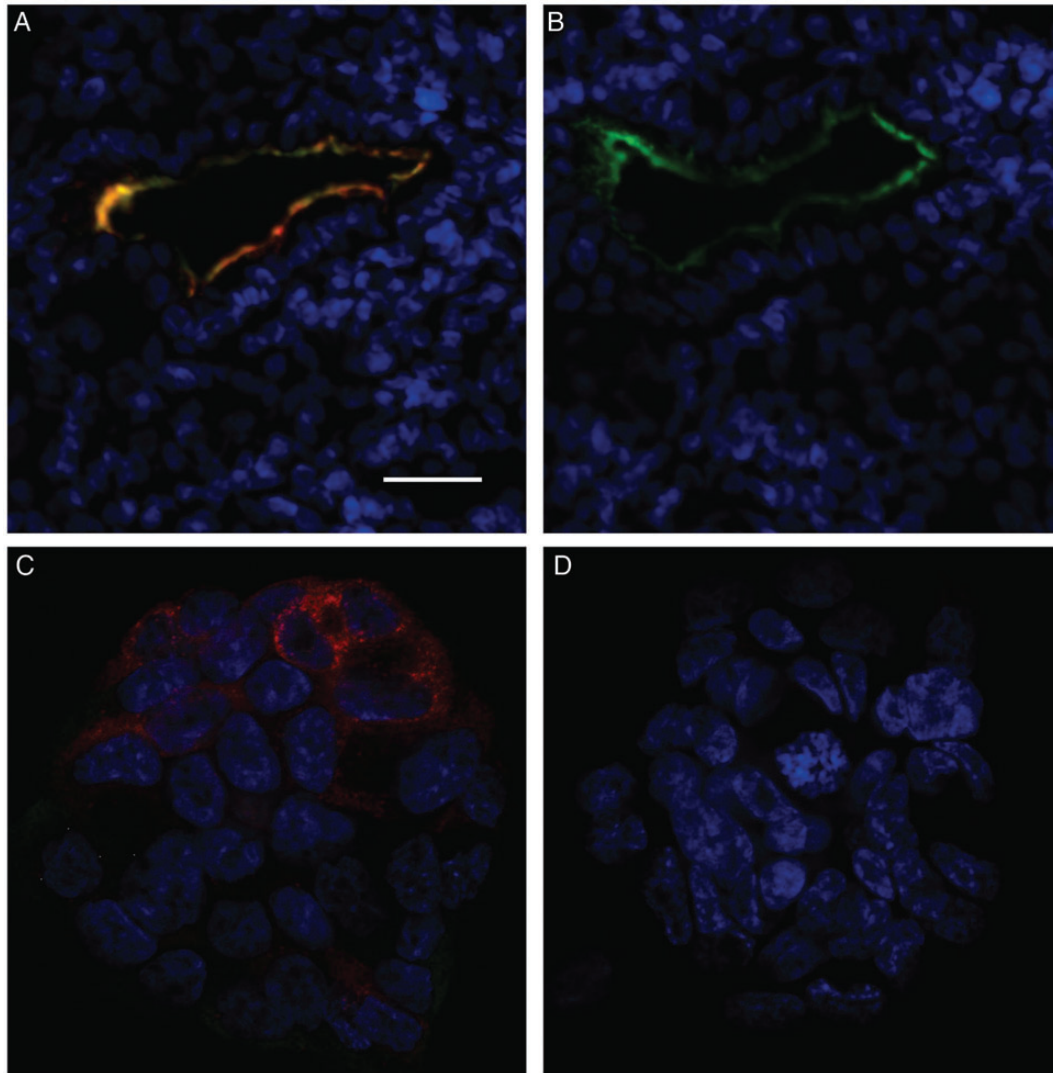

**Supplementary Figure S1** MUC1 and MUC16 are detected in proliferative stage (endometriosis stage II) glandular endometrium. **(A)** MUC1 (green) and MUC16 (red) are detected in glandular epithelium of proliferative stage endometrium of women with endometriosis. **(B)** MUC4 (red) is not detected. MUC1 (green) is used as an epithelial marker. **(C)** MUC4 (red) is detected in the human pancreatic adenocarcinoma (HPAF) cell line. **(D)** HPAF cells with secondary antibody only. Scale bar is 50  $\mu\text{m}$ .
